# Supplementary material for: Red flags for potential serious pathologies in people with neck pain: a systematic review of clinical practice guidelines
Source: PubMed Central journal article supplement — Arch Physiother. 2024 Dec 4;14:105–15. doi: 10.33393/aop.2024.3245 (PMC11618059; doi:10.33393/aop.2024.3245), 2024-12-04
Supplement: Supplementary_Material.pdf [file Supplementary_Material.pdf]

## SUPPLEMENTARY MATERIAL 1 – SEARCH STRATEGIES

### MEDLINE (via PubMed)

("Neck Pain"[MeSH Terms] OR "Neck Pain"[Title/Abstract] OR "cervical pain"[Title/Abstract] OR "neckache\*"[Title/Abstract] OR "neck ache\*"[Title/Abstract] OR "cervicodynia"[Title/Abstract] OR "cervical vertebrae"[Title/Abstract] OR "cervical spine"[Title/Abstract] OR "cervico\*"[Title/Abstract] OR whiplash[Title/Abstract] OR "Radiculopathy"[Mesh] OR "Cervical radiculopathy"[Title/Abstract] OR "Post-Traumatic Headache"[Mesh]) AND ("guideline\*"[Title/Abstract] OR "Guideline" [PT] OR "Guidelines as Topic"[Majr] OR Consensus Development Conference [PT])

### EMBASE

('Neck Pain'/exp OR 'Neck Pain':ti,ab OR 'cervical pain':ti,ab OR neckache\*:ti,ab OR 'neck ache\*:ti,ab OR cervicodynia:ti,ab OR 'cervical vertebrae':ti,ab OR 'cervical spine':ti,ab OR cervico\*:ti,ab OR whiplash:ti,ab OR Radiculopathy/exp OR 'Cervical radiculopathy':ti,ab OR 'Post-Traumatic Headache'/exp) AND ('guideline\*':ti OR ((practice\* OR clinic\*) NEAR/2 guideline\*):ti,ab OR 'practice guideline'/exp OR 'consensus development'/exp)

## SUPPLEMENTARY MATERIAL 2 – REFERENCE TO THE INCLUDED GUIDELINES

| FIRST AUTHOR AND YEAR                | TITLE                                                                                                                                                                                                              |
|--------------------------------------|--------------------------------------------------------------------------------------------------------------------------------------------------------------------------------------------------------------------|
| Albright, 2001 <sup>1</sup>          | Philadelphia Panel Evidence-Based Clinical Practice Guidelines on Selected Rehabilitation Interventions for Neck Pain                                                                                              |
| Bekkering, 2003 <sup>2</sup>         | Clinical practice guidelines for physical therapy in patients with whiplash-associated disorders                                                                                                                   |
| Bier, 2018 <sup>3</sup>              | Clinical Practice Guideline for Physical Therapy Assessment and Treatment in Patients With Nonspecific Neck Pain                                                                                                   |
| Blanpied, 2017 <sup>4</sup>          | Neck Pain: Revision 2017 - Clinical Practice Guidelines Linked to the International Classification of Functioning, Disability and Health From the Orthopaedic Section of the American Physical Therapy Association |
| Bono, 2011 <sup>5</sup>              | An evidence-based clinical guideline for the diagnosis and treatment of cervical radiculopathy from degenerative disorders                                                                                         |
| Brosseau, 2012 <sup>6</sup>          | Ottawa panel evidence-based clinical practice guidelines on therapeutic massage for neck pain                                                                                                                      |
| Bussi eres, 2016 <sup>7</sup>        | The Treatment of Neck Pain–Associated Disorders and Whiplash-Associated Disorders: A Clinical Practice Guideline                                                                                                   |
| Cot e, 2016 <sup>8</sup>             | Management of neck pain and associated disorders: A clinical practice guideline from the Ontario Protocol for Traffic Injury Management (OPTIMa) Collaboration                                                     |
| Chu, 2017 <sup>9</sup>               | Clinical practice guidelines of acupuncture-moxibustion for cervical spondylotic radiculopathy                                                                                                                     |
| Gonzalez Ramirez, 2005 <sup>10</sup> | Clinical guidelines for the rehabilitation of the patient with cervical sprain, at the first level of care.                                                                                                        |
| Gross, 2002 <sup>11</sup>            | Clinical practice guideline on the use of manipulation or mobilization in the treatment of adults with mechanical neck disorders                                                                                   |
| Hurley, 2021 <sup>12</sup>           | Consensus practice guidelines on interventions for cervical spine (facet) joint pain from a multispecialty international working group                                                                             |
| Karpinnen, 2017 <sup>13</sup>        | Neck pain (adults)                                                                                                                                                                                                 |
| Lang, 2007 <sup>14</sup>             | Sprain and strain of the cervical spine                                                                                                                                                                            |
| Latka, 2015 <sup>15</sup>            | Treatment of degenerative cervical spondylosis with radiculopathy. Clinical practice guidelines endorsed by The Polish Society of Spinal Surgery                                                                   |
| Lee, 2021 <sup>16</sup>              | An evidence-based approach for the development of a clinical practice guideline for the treatment of neck pain using traditional Korean medicine                                                                   |
| Leigh, 2005 <sup>17</sup>            | Clinical Practice Guidelines for Physiotherapy Management of Patients with Whiplash Associated Disorders                                                                                                           |
| Lemeunier, 2017 <sup>18</sup>        | Assessment of the patient with neck pain and decision-making chiropractic therapeutics                                                                                                                             |

|                                       |                                                                                                                                                                  |
|---------------------------------------|------------------------------------------------------------------------------------------------------------------------------------------------------------------|
| Monticone, 2013 <sup>19</sup>         | The Italian Society of Physical and Rehabilitation Medicine (SIMFER) recommendations for neck pain                                                               |
| Moore, 2005 <sup>20</sup>             | Clinical guidelines for the physiotherapy management of Whiplash Associated Disorders                                                                            |
| Papic, 2023 <sup>21</sup>             | Australian Clinical Guidelines for Health Professionals Managing People with Whiplash-Associated Disorders, Fourth Edition                                       |
| Pohl, 2018 <sup>22</sup>              | Cervical radiculopathy                                                                                                                                           |
| Scherer, 2016 <sup>23</sup>           | Neck pain                                                                                                                                                        |
| State of Colorado, 2022 <sup>24</sup> | Cervical Spine Injury - Medical Treatment Guidelines                                                                                                             |
| Sterling, 2008 <sup>25</sup>          | Clinical guidelines for best practice management of acute and chronic whiplash-associated disorders                                                              |
| Sundhedsstyrelsen, 2018 <sup>26</sup> | National clinical guideline for the non-surgical treatment of new-onset root involvement in the neck with radiating symptoms to the arm (cervical radiculopathy) |
| Sundhedsstyrelsen, 2010 <sup>27</sup> | National clinical guideline for non-surgical treatment of new-onset non-specific neck pain                                                                       |
| Whalen, 2019 <sup>28</sup>            | Best-Practice Recommendations for Chiropractic Management of Patients With Neck Pain                                                                             |
| Xiao, 2021 <sup>29</sup>              | Expert panel's guideline on cervicogenic headache: The Chinese Association for the Study of Pain recommendation                                                  |

1. Albright J, Allman R, Bonfiglio RP, et al. Philadelphia Panel Evidence-Based Clinical Practice Guidelines on Selected Rehabilitation Interventions for Neck Pain. *Physical Therapy*. 2001;81(10):1701-1717. doi:10.1093/ptj/81.10.1701
2. Scholten-Peeters GGM, Bekkering GE, Verhagen AP, et al. Clinical practice guideline for the physiotherapy of patients with whiplash-associated disorders. *Spine (Phila Pa 1976)*. 2002;27(4):412-422. doi:10.1097/00007632-200202150-00018
3. Bier JD, Scholten-Peeters WGM, Staal JB, et al. Clinical Practice Guideline for Physical Therapy Assessment and Treatment in Patients With Nonspecific Neck Pain. *Phys Ther*. 2018;98(3):162-171. doi:10.1093/ptj/pzx118
4. Blanpied PR, Gross AR, Elliott JM, et al. Neck Pain: Revision 2017. *Journal of Orthopaedic & Sports Physical Therapy*. 2017;47(7):A1-A83. doi:10.2519/jospt.2017.0302
5. Bono CM, Ghiselli G, Gilbert TJ, et al. An evidence-based clinical guideline for the diagnosis and treatment of cervical radiculopathy from degenerative disorders. *Spine J*. 2011;11(1):64-72. doi:10.1016/j.spinee.2010.10.023

6. Brosseau L, Wells GA, Tugwell P, et al. Ottawa Panel evidence-based clinical practice guidelines on therapeutic massage for neck pain. *J Bodyw Mov Ther.* 2012;16(3):300-325. doi:10.1016/j.jbmt.2012.04.001
7. Bussi eres AE, Stewart G, Al-Zoubi F, et al. The Treatment of Neck Pain-Associated Disorders and Whiplash-Associated Disorders: A Clinical Practice Guideline. *J Manipulative Physiol Ther.* 2016;39(8):523-564.e27. doi:10.1016/j.jmpt.2016.08.007
8. C ot e P, Wong JJ, Sutton D, et al. Management of neck pain and associated disorders: A clinical practice guideline from the Ontario Protocol for Traffic Injury Management (OPTIMa) Collaboration. *Eur Spine J.* 2016;25(7):2000-2022. doi:10.1007/s00586-016-4467-7
9. Chu H ran, Hu J, Sun K, Song Y chun, Long X na, Li N. Clinical practice guidelines of acupuncture-moxibustion for cervical spondylotic radiculopathy. *World Journal of Acupuncture - Moxibustion.* 2017;27(1):3-11. doi:10.1016/S1003-5257(17)30091-0
10. Ram rez SG, Ruiz ESC. Gu a cl nica para la rehabilitaci n del paciente con esguince cervical, en el primer nivel de atenci n.
11. Gross AR, Kay TM, Kennedy C, et al. Clinical practice guideline on the use of manipulation or mobilization in the treatment of adults with mechanical neck disorders. *Man Ther.* 2002;7(4):193-205. doi:10.1054/math.2002.0477
12. Hurley RW, Adams MCB, Barad M, et al. Consensus practice guidelines on interventions for cervical spine (facet) joint pain from a multispecialty international working group. *Reg Anesth Pain Med.* 2022;47(1):3-59. doi:10.1136/rapm-2021-103031
13. Esercizio (manutenzione interrotta). Accessed January 3, 2024. <https://www.kaypahoito.fi/hoi50075>
14. Lang C, Badke A, Grifka J, et al. Leitlinie: Begutachtung der Halswirbels ulendistorsion. *Akt Neurol.* 2008;35(3):131-137. doi:10.1055/s-2007-986408
15. Latka D, Miekisiak G, Jarmuzek P, Lachowski M, Kaczmarczyk J. Treatment of degenerative cervical spondylosis with radiculopathy. Clinical practice guidelines endorsed by The Polish Society of Spinal Surgery. *Neurol Neurochir Pol.* 2016;50(2):109-113. doi:10.1016/j.pjnns.2015.12.002
16. Lee YJ, Kim M riong, Lee EJ, et al. An evidence-based approach for the development of a clinical practice guideline for the treatment of neck pain using traditional Korean medicine. *European Journal of Integrative Medicine.* 2021;44:101337. doi:10.1016/j.eujim.2021.101337
17. Clinical Practice Guidelines for Physiotherapy Management of Patients with Whiplash Associated Disorders (WAD): \*Summary Version for Quick Reference - PDF Free Download. Accessed February 17, 2024. <https://docplayer.net/951113-Clinical-practice-guidelines-for-physiotherapy-management-of-patients-with-whiplash-associated-disorders-wad-summary-version-for-quick-reference.html>

18. Label de la HAS - Évaluation du patient atteint de cervicalgie et prise de décision thérapeutique en chiropraxie. Haute Autorité de Santé. Accessed January 3, 2024. [https://www.has-sante.fr/jcms/c\\_2803360/fr/label-de-la-has-evaluation-du-patient-atteint-de-cervicalgie-et-prise-de-decision-therapeutique-en-chiropraxie](https://www.has-sante.fr/jcms/c_2803360/fr/label-de-la-has-evaluation-du-patient-atteint-de-cervicalgie-et-prise-de-decision-therapeutique-en-chiropraxie)
19. Monticone M, Iovine R, de Sena G, et al. The Italian Society of Physical and Rehabilitation Medicine (SIMFER) recommendations for neck pain. *G Ital Med Lav Ergon*. 2013;35(1):36-50.
20. Moore A, Jackson A, Jordan J, et al. *Clinical Guidelines for the Physiotherapy Management of Whiplash Associated Disorder*. Chartered Society of Physiotherapy; 2005.
21. Papic. Australian Clinical Guidelines for Health Professionals Managing People with Whiplash-Associated Disorders, Fourth Edition.
22. Pohl M, Back T, Leimert M, et al. Zervikale Radikulopathie. *Aktuelle Neurologie*. 2018;45(5):349-369. doi:10.1055/a-0575-7066
23. Scherer M, Chenot JF. Deutsche Gesellschaft für Allgemeinmedizin und Familienmedizin. Published online 2016.
24. Medical Treatment Guidelines | Department of Labor & Employment. Accessed January 3, 2024. <https://cdle.colorado.gov/medical-providers/medical-treatment-guidelines>
25. Clinical guidelines for best practice management of acute and chronic whiplash-associated disorders - UQ eSpace. Accessed January 3, 2024. <https://espace.library.uq.edu.au/view/UQ:266894>
26. National-klinisk-retningslinje-cervikal-radikulopati.pdf. Accessed February 17, 2024. [https://www.sst.dk/-/media/Udgivelser/2015/NKR-Behandling-af-udstr%C3%A5lende-smerter-fra-nakken---cervikal-radikulopati/National-klinisk-retningslinje-cervikal-radikulopati.ashx?sc\\_lang=da&hash=CCE73F4FF1FAD9DB690F6FE0B2135ADB](https://www.sst.dk/-/media/Udgivelser/2015/NKR-Behandling-af-udstr%C3%A5lende-smerter-fra-nakken---cervikal-radikulopati/National-klinisk-retningslinje-cervikal-radikulopati.ashx?sc_lang=da&hash=CCE73F4FF1FAD9DB690F6FE0B2135ADB)
27. NKR: Ikke-kirurgisk behandling af nyopståede uspecifikke nakkesmerter - ikke gældende. Accessed January 3, 2024. <https://www.sst.dk/da/udgivelser/2016/nkr-ikke-kirurgisk-behandling-af-nyopstaaede-uspecifikke-nakkesmerter>
28. Whalen W, Farabaugh RJ, Hawk C, et al. Best-Practice Recommendations for Chiropractic Management of Patients With Neck Pain. *J Manipulative Physiol Ther*. 2019;42(9):635-650. doi:10.1016/j.jmpt.2019.08.001
29. Xiao H, Peng BG, Ma K, et al. Expert panel's guideline on cervicogenic headache: The Chinese Association for the Study of Pain recommendation. *World J Clin Cases*. 2021;9(9):2027-2036. doi:10.12998/wjcc.v9.i9.2027

## SUPPLEMENTARY MATERIAL 3

## CHARACTERISTICS OF THE GUIDELINES WITH DIAGNOSTIC RECCOMANDATIONS, BUT NO RED FLAGS RECCOMANDATIONS

| Author and year         | Nation      | Language | Society                                                                                         | Population (as reported in the guideline) |
|-------------------------|-------------|----------|-------------------------------------------------------------------------------------------------|-------------------------------------------|
| State of Colorado, 2022 | USA         | English  | Department of Labor and Employment                                                              | Neck pain                                 |
| Hurley, 2021            | USA         | English  | American Academy of Pain Medicine and American Society of Regional Anesthesia and Pain Medicine | Cervical spine facet joint pain           |
| Xiao, 2021              | China       | English  | Chinese Association for the Study of Pain                                                       | Cervicogenic headache                     |
| Pohl, 2018              | Germany     | German   | German Society for Neurology                                                                    | Degenerative Cervical radiculopathy       |
| Chu, 2017               | China       | English  | China Association of Acupuncture-moxibustion                                                    | Cervical Spondylotic Radiculopathy        |
| Bekkering, 2003         | Netherlands | English  | Royal Dutch Society for Physical Therapy (KNGF)                                                 | Whiplash-associated disorders             |
| Bono, 2011              | USA         | English  | North American Spine Society                                                                    | Cervical radiculopathy                    |
| Lang, 2007              | Germany     | German   | Several specialist German societies                                                             | WAD                                       |
| Gonzalez Ramirez, 2005  | Mexico      | Spanish  | Mexican Social Security Institute                                                               | WAD                                       |
| Leigh, 2005             | Canada      | English  | Physiotherapy Association of British Columbia                                                   | WAD grades I to III                       |

WAD: Whiplash and associated disorders

## CHARACTERISTICS OF THE GUIDELINES WITHOUT DIAGNOSTIC RECOMMENDATIONS

| Author and year         | Nation      | Language | Society                                       | Population (as reported in the guideline)                                                                                      |
|-------------------------|-------------|----------|-----------------------------------------------|--------------------------------------------------------------------------------------------------------------------------------|
| Lee, 2021               | South Korea | English  | The Society of Korean Medicine Rehabilitation | Neck pain                                                                                                                      |
| Sundhedsstyrelsen, 2020 | Denmark     | Danish   | Danish Health Authority                       | Non – specific neck pain                                                                                                       |
| Sundhedsstyrelsen, 2018 | Denmark     | Danish   | Danish Health Authority                       | Cervical radiculopathy                                                                                                         |
| Latka, 2015             | Poland      | English  | Polish Society of Spinal Surgery              | Degenerative cervical spondylosis with radiculopathy                                                                           |
| Brosseau, 2012          | Canada      | English  | Ottawa Panel                                  | Mechanical neck pain, neck pain with headache, neck pain with radicular findings                                               |
| Gross, 2002             | Canada      | English  | College of Physiotherapists of Ontario        | Mechanical neck disorders, neck disorders with headache of cervical origin and neck disorders with radicular signs or symptoms |
| Albright, 2001          | USA         | English  | Philadelphia Panel                            | Non-specific neck pain                                                                                                         |

TABLE WITH THE RED FLAGS RECOMMENDED BY CLINICAL PRACTICE GUIDELINES

| Red flag                                                          | Guideline       | Level of evidence underpinning the recommendations with references cited by the guideline | Diagnostic accuracy values                                                                 | Reported literature underpinning the red flag recommendation                                                                                                                                                            |
|-------------------------------------------------------------------|-----------------|-------------------------------------------------------------------------------------------|--------------------------------------------------------------------------------------------|-------------------------------------------------------------------------------------------------------------------------------------------------------------------------------------------------------------------------|
| <b>FRACTURES (Number of guidelines = 7, Red flags = 14)</b>       |                 |                                                                                           |                                                                                            |                                                                                                                                                                                                                         |
| <b>Positive Canadian C-spine rule</b>                             | Papic, 2023     | Level 1 <sup>1</sup>                                                                      | Sensitivity: range 90 to 100%                                                              | Not reported                                                                                                                                                                                                            |
|                                                                   | Blanpied, 2017  | Level 2 <sup>2 3 4</sup>                                                                  | Sensitivity: 99.4% (95% CI: 96 – 100)<br>Specificity: 45.1% (95% CI: 44 – 46)<br>NPV: 100% | Not reported                                                                                                                                                                                                            |
|                                                                   | Coté, 2016      | Level 1 <sup>5 6 7</sup>                                                                  | Not reported                                                                               | <i>“As there is a paucity of literature on red flags for neck pain, the list of red flags was informed by the low back pain literature”</i>                                                                             |
|                                                                   | Sterling, 2008  | Level 2 <sup>4,8</sup>                                                                    | Sensitivity: 100%<br>Specificity: 42.5%                                                    | <i>“One or two primary studies with low risk of bias”</i>                                                                                                                                                               |
| <b>Positive Canadian C-spine rule in patients aged 65 or less</b> | Lemeunier, 2017 | Not reported                                                                              | Not reported                                                                               | <i>“Based on scientific presumption provided by studies with an intermediate level of evidence, such as low-powered randomized controlled trials, well-conducted nonrandomized comparative studies, cohort studies”</i> |
| <b>Positive NEXUS criteria</b>                                    | Blanpied, 2017  | Level 2 <sup>9</sup>                                                                      | Sensitivity 90.7% (CI 95%: 85 - 94)<br>Specificity: 36.8% (CI 95%: 36 - 88)<br>NPV: 99.4%  | Not reported                                                                                                                                                                                                            |
| <b>Positive NEXUS criteria in patients aged more than 65</b>      | Lemeunier, 2017 | Not reported                                                                              | Not reported                                                                               | <i>“Based on scientific presumption provided by studies with an intermediate level of evidence, such as low-powered randomized controlled trials, well-conducted nonrandomized comparative studies, cohort studies”</i> |
| <b>Traumatic event</b>                                            | Bier, 2018      | Level 5 <sup>7 10</sup>                                                                   | Not reported                                                                               | Not reported                                                                                                                                                                                                            |
|                                                                   | Monticone, 2013 | Level 5 <sup>7,11</sup>                                                                   | Not reported                                                                               | <i>“Evidence based on the opinions of experts in guidelines or during consensus conferences, or the opinions of the members of the working group responsible for these recommendations.”</i>                            |
| <b>Prolonged steroid treatment</b>                                | Monticone, 2013 | Level 5 <sup>7,11</sup>                                                                   | Not reported                                                                               | <i>“Evidence based on the opinions of experts in guidelines or during consensus conferences, or the opinions of the members of the working group responsible for these recommendations.”</i>                            |
| <b>History of osteoporosis</b>                                    | Bier, 2018      | Level 5 <sup>7</sup>                                                                      | Not reported                                                                               | Not reported                                                                                                                                                                                                            |
|                                                                   | Monticone, 2013 | Level 5 <sup>7,11</sup>                                                                   | Not reported                                                                               | <i>“Evidence based on the opinions of experts in guidelines or during consensus conferences, or the</i>                                                                                                                 |

|                                                                         |                 |                          |              |                                                                                                                                                                                              |
|-------------------------------------------------------------------------|-----------------|--------------------------|--------------|----------------------------------------------------------------------------------------------------------------------------------------------------------------------------------------------|
|                                                                         |                 |                          |              | <i>opinions of the members of the working group responsible for these recommendations.”</i>                                                                                                  |
| <b>Age &lt; 20</b>                                                      | Monticone, 2013 | Level 5 <sup>7,11</sup>  | Not reported | <i>“Evidence based on the opinions of experts in guidelines or during consensus conferences, or the opinions of the members of the working group responsible for these recommendations.”</i> |
| <b>Age &gt; 60</b>                                                      | Monticone, 2013 | Level 5 <sup>7,11</sup>  | Not reported | <i>“Evidence based on the opinions of experts in guidelines or during consensus conferences, or the opinions of the members of the working group responsible for these recommendations.”</i> |
| <b>Older age</b>                                                        | Bier, 2018      | Level 5 <sup>10</sup>    | Not reported | Not reported                                                                                                                                                                                 |
| <b>Intractable pain continuing one month after treatment</b>            | Monticone, 2013 | Level 5 <sup>7,11</sup>  | Not reported | <i>“Evidence based on the opinions of experts in guidelines or during consensus conferences, or the opinions of the members of the working group responsible for these recommendations.”</i> |
| <b>Nocturnal pain</b>                                                   | Monticone, 2013 | Level 5 <sup>7,11</sup>  | Not reported | <i>“Evidence based on the opinions of experts in guidelines or during consensus conferences, or the opinions of the members of the working group responsible for these recommendations.”</i> |
| <b>Pain related to movement and posture</b>                             | Monticone, 2013 | Level 5 <sup>7,11</sup>  | Not reported | <i>“Evidence based on the opinions of experts in guidelines or during consensus conferences, or the opinions of the members of the working group responsible for these recommendations.”</i> |
| <b>Pain of the spinous processes</b>                                    | Monticone, 2013 | Level 5 <sup>7,11</sup>  | Not reported | <i>“Evidence based on the opinions of experts in guidelines or during consensus conferences, or the opinions of the members of the working group responsible for these recommendations.”</i> |
| <b>OSTEOPOROTIC FRACTURES (Number of guidelines = 2, Red flags = 3)</b> |                 |                          |              |                                                                                                                                                                                              |
| <b>History of osteoporosis</b>                                          | Lemeunier, 2017 | Not reported             | Not reported | Not reported                                                                                                                                                                                 |
|                                                                         | Coté, 2016      | Level 5 <sup>5 6 7</sup> | Not reported | <i>“As there is a paucity of literature on red flags for neck pain, the list of red flags was informed by the low back pain literature”</i>                                                  |
| <b>Use of corticosteroids</b>                                           | Lemeunier, 2017 | Not reported             | Not reported | Not reported                                                                                                                                                                                 |
|                                                                         | Coté, 2016      | Level 5 <sup>5 6 7</sup> | Not reported | <i>“As there is a paucity of literature on red flags for neck pain, the list of red flags was informed by the low back pain literature”</i>                                                  |
| <b>Older age</b>                                                        | Lemeunier, 2017 | Not reported             | Not reported | Not reported                                                                                                                                                                                 |
|                                                                         | Coté, 2016      | Level 5 <sup>5 6 7</sup> | Not reported | <i>“As there is a paucity of literature on red flags for neck pain, the list of red flags was informed by the low back pain literature”</i>                                                  |



| <b>CANCER (Number of guidelines = 5, Red flags = 21)</b>     |                 |                          |              |                                                                                                                                                                                              |
|--------------------------------------------------------------|-----------------|--------------------------|--------------|----------------------------------------------------------------------------------------------------------------------------------------------------------------------------------------------|
| <b>History of cancer</b>                                     | Bier, 2018      | Level 5 <sup>12 7</sup>  | Not reported | Not reported                                                                                                                                                                                 |
|                                                              | Karppinen, 2017 | Level 5 <sup>13</sup>    | Not reported | Not reported                                                                                                                                                                                 |
|                                                              | Lemeunier, 2017 | Not reported             | Not reported | Not reported                                                                                                                                                                                 |
|                                                              | Coté, 2016      | Level 5 <sup>5 6 7</sup> | Not reported | <i>“As there is a paucity of literature on red flags for neck pain, the list of red flags was informed by the low back pain literature”</i>                                                  |
|                                                              | Monticone, 2013 | Level 5 <sup>7,11</sup>  | Not reported | <i>“Evidence based on the opinions of experts in guidelines or during consensus conferences, or the opinions of the members of the working group responsible for these recommendations.”</i> |
| <b>Unexplained weight loss</b>                               | Bier, 2018      | Level 5 <sup>12 7</sup>  | Not reported | Not reported                                                                                                                                                                                 |
|                                                              | Karppinen, 2017 | Level 5 <sup>13</sup>    | Not reported | Not reported                                                                                                                                                                                 |
|                                                              | Lemeunier, 2017 | Not reported             | Not reported | Not reported                                                                                                                                                                                 |
|                                                              | Coté, 2016      | Level 5 <sup>5 6 7</sup> | Not reported | <i>“As there is a paucity of literature on red flags for neck pain, the list of red flags was informed by the low back pain literature”</i>                                                  |
|                                                              | Monticone, 2013 | Level 5 <sup>7,11</sup>  | Not reported | <i>“Evidence based on the opinions of experts in guidelines or during consensus conferences, or the opinions of the members of the working group responsible for these recommendations.”</i> |
| <b>Poor general health</b>                                   | Karppinen, 2017 | Level 5 <sup>13</sup>    | Not reported | Not reported                                                                                                                                                                                 |
| <b>Nocturnal pain</b>                                        | Lemeunier, 2017 | Not reported             | Not reported | Not reported                                                                                                                                                                                 |
|                                                              | Coté, 2016      | Level 5 <sup>5 6 7</sup> | Not reported | <i>“As there is a paucity of literature on red flags for neck pain, the list of red flags was informed by the low back pain literature”</i>                                                  |
|                                                              | Monticone, 2013 | Level 5 <sup>7,11</sup>  | Not reported | <i>“Evidence based on the opinions of experts in guidelines or during consensus conferences, or the opinions of the members of the working group responsible for these recommendations.”</i> |
| <b>Pain that wakes you up in the morning</b>                 | Karppinen, 2017 | Level 5 <sup>13</sup>    | Not reported | Not reported                                                                                                                                                                                 |
| <b>Intractable pain continuing one month after treatment</b> | Monticone, 2013 | Level 5 <sup>7,11</sup>  | Not reported | <i>“Evidence based on the opinions of experts in guidelines or during consensus conferences, or the</i>                                                                                      |

|                                                                                                 |                 |                          |              |                                                                                                                                                                                              |
|-------------------------------------------------------------------------------------------------|-----------------|--------------------------|--------------|----------------------------------------------------------------------------------------------------------------------------------------------------------------------------------------------|
|                                                                                                 |                 |                          |              | <i>opinions of the members of the working group responsible for these recommendations.”</i>                                                                                                  |
| <b>Pain related to movement and posture</b>                                                     | Monticone, 2013 | Level 5 <sup>7,11</sup>  | Not reported | <i>“Evidence based on the opinions of experts in guidelines or during consensus conferences, or the opinions of the members of the working group responsible for these recommendations.”</i> |
| <b>Intolerable pain that cannot be relieved at rest</b>                                         | Karppinen, 2017 | Level 5 <sup>13</sup>    | Not reported | Not reported                                                                                                                                                                                 |
| <b>Pain that worsens excessively within a short period of time</b>                              | Karppinen, 2017 | Level 5 <sup>13</sup>    | Not reported | Not reported                                                                                                                                                                                 |
| <b>Pain of the spinous processes</b>                                                            | Monticone, 2013 | Level 5 <sup>7,11</sup>  | Not reported | <i>“Evidence based on the opinions of experts in guidelines or during consensus conferences, or the opinions of the members of the working group responsible for these recommendations.”</i> |
| <b>Age &gt; 50</b>                                                                              | Bier, 2018      | Level 5 <sup>12</sup>    | Not reported | Not reported                                                                                                                                                                                 |
|                                                                                                 | Lemeunier, 2017 | Not reported             | Not reported | Not reported                                                                                                                                                                                 |
|                                                                                                 | Coté, 2016      | Level 5 <sup>5 6 7</sup> | Not reported | <i>“As there is a paucity of literature on red flags for neck pain, the list of red flags was informed by the low back pain literature”</i>                                                  |
| <b>Age &lt; 20</b>                                                                              | Monticone, 2013 | Level 5 <sup>7,11</sup>  | Not reported | <i>“Evidence based on the opinions of experts in guidelines or during consensus conferences, or the opinions of the members of the working group responsible for these recommendations.”</i> |
| <b>Age &gt; 60</b>                                                                              | Monticone, 2013 | Level 5 <sup>7,11</sup>  | Not reported | <i>“Evidence based on the opinions of experts in guidelines or during consensus conferences, or the opinions of the members of the working group responsible for these recommendations.”</i> |
| <b>Lack of improvement after first month of treatment</b>                                       | Bier, 2018      | Level 5 <sup>12 7</sup>  | Not reported | Not reported                                                                                                                                                                                 |
|                                                                                                 | Monticone, 2013 | Level 5 <sup>7,11</sup>  | Not reported | <i>“Evidence based on the opinions of experts in guidelines or during consensus conferences, or the opinions of the members of the working group responsible for these recommendations.”</i> |
| <b>Marked deviation from the norm in intensity, location, duration or response to treatment</b> | Karppinen, 2017 | Level 5 <sup>13</sup>    | Not reported | Not reported                                                                                                                                                                                 |
| <b>Palpable cervical or paracervical masses</b>                                                 | Monticone, 2013 | Level 5 <sup>7,11</sup>  | Not reported | <i>“Evidence based on the opinions of experts in guidelines or during consensus conferences, or the opinions of the members of the working group responsible for these recommendations.”</i> |

|                                                                                                        |                 |                                |              |                                                                                                                                                                                              |
|--------------------------------------------------------------------------------------------------------|-----------------|--------------------------------|--------------|----------------------------------------------------------------------------------------------------------------------------------------------------------------------------------------------|
| <b>Fever</b>                                                                                           | Karppinen, 2017 | Level 5 <sup>13</sup>          | Not reported | Not reported                                                                                                                                                                                 |
| <b>Abnormal fatigue</b>                                                                                | Karppinen, 2017 | Level 5 <sup>13</sup>          | Not reported | Not reported                                                                                                                                                                                 |
| <b>Headache</b>                                                                                        | Bier, 2018      | Level 5 <sup>7</sup>           | Not reported | Not reported                                                                                                                                                                                 |
| <b>Vomiting</b>                                                                                        | Bier, 2018      | Level 5 <sup>7</sup>           | Not reported | Not reported                                                                                                                                                                                 |
| <b>Dysphagia</b>                                                                                       | Bier, 2018      | Level 5 <sup>7</sup>           | Not reported | Not reported                                                                                                                                                                                 |
| <b>SPINAL INFECTION (Number of guidelines = 4, Red flags = 14)</b>                                     |                 |                                |              |                                                                                                                                                                                              |
| <b>Symptoms and signs of infection (e.g., fever, night sweats)</b>                                     | Bier, 2018      | Level 5 <sup>7</sup>           | Not reported | Not reported                                                                                                                                                                                 |
| <b>Risk factors for infection (e.g., immunosuppression, penetrating wound, intravenous drug abuse)</b> | Bier, 2018      | Level 5 <sup>7</sup>           | Not reported | Not reported                                                                                                                                                                                 |
| <b>Fever</b>                                                                                           | Lemeunier, 2017 | Not reported                   | Not reported | Not reported                                                                                                                                                                                 |
|                                                                                                        | Coté, 2016      | Level 5 <sup>5 6 7</sup>       | Not reported | <i>“As there is a paucity of literature on red flags for neck pain, the list of red flags was informed by the low back pain literature”</i>                                                  |
|                                                                                                        | Monticone, 2013 | Level 5 <sup>7,11</sup>        | Not reported | <i>“Evidence based on the opinions of experts in guidelines or during consensus conferences, or the opinions of the members of the working group responsible for these recommendations.”</i> |
| <b>Intravenous drug use</b>                                                                            | Lemeunier, 2017 | Not reported                   | Not reported | Not reported                                                                                                                                                                                 |
|                                                                                                        | Coté, 2016      | Level 5 field <sup>5 6 7</sup> | Not reported | <i>“As there is a paucity of literature on red flags for neck pain, the list of red flags was informed by the low back pain literature”</i>                                                  |
| <b>Drug addiction</b>                                                                                  | Monticone, 2013 | Level 5 <sup>7,11</sup>        | Not reported | <i>“Evidence based on the opinions of experts in guidelines or during consensus conferences, or the opinions of the members of the working group responsible for these recommendations.”</i> |
| <b>Recent infection</b>                                                                                | Lemeunier, 2017 | Not reported                   | Not reported | Not reported                                                                                                                                                                                 |
|                                                                                                        | Coté, 2016      | Level 5 <sup>5 6 7</sup>       | Not reported | <i>“As there is a paucity of literature on red flags for neck pain, the list of red flags was informed by the low back pain literature”</i>                                                  |
|                                                                                                        | Monticone, 2013 | Level 5 <sup>7,11</sup>        | Not reported | <i>“Evidence based on the opinions of experts in guidelines or during consensus conferences, or the opinions of the members of the working group</i>                                         |

|                                                              |                 |                          |              |                                                                                                                                                                                              |
|--------------------------------------------------------------|-----------------|--------------------------|--------------|----------------------------------------------------------------------------------------------------------------------------------------------------------------------------------------------|
|                                                              |                 |                          |              | <i>responsible for these recommendations.</i> "                                                                                                                                              |
| <b>HIV positivity</b>                                        | Monticone, 2013 | Level 5 <sup>7,11</sup>  | Not reported | <i>"Evidence based on the opinions of experts in guidelines or during consensus conferences, or the opinions of the members of the working group responsible for these recommendations."</i> |
| <b>Immunosuppression</b>                                     | Monticone, 2013 | Level 5 <sup>7,11</sup>  | Not reported | <i>"Evidence based on the opinions of experts in guidelines or during consensus conferences, or the opinions of the members of the working group responsible for these recommendations."</i> |
| <b>Age &lt; 20</b>                                           | Monticone, 2013 | Level 5 <sup>7,11</sup>  | Not reported | <i>"Evidence based on the opinions of experts in guidelines or during consensus conferences, or the opinions of the members of the working group responsible for these recommendations."</i> |
| <b>Age &gt; 60</b>                                           | Monticone, 2013 | Level 5 <sup>7,11</sup>  | Not reported | <i>"Evidence based on the opinions of experts in guidelines or during consensus conferences, or the opinions of the members of the working group responsible for these recommendations."</i> |
| <b>Intractable pain continuing one month after treatment</b> | Monticone, 2013 | Level 5 <sup>7,11</sup>  | Not reported | <i>"Evidence based on the opinions of experts in guidelines or during consensus conferences, or the opinions of the members of the working group responsible for these recommendations."</i> |
| <b>Nocturnal pain</b>                                        | Monticone, 2013 | Level 5 <sup>7,11</sup>  | Not reported | <i>"Evidence based on the opinions of experts in guidelines or during consensus conferences, or the opinions of the members of the working group responsible for these recommendations."</i> |
| <b>Pain related to movement and posture</b>                  | Monticone, 2013 | Level 5 <sup>7,11</sup>  | Not reported | <i>"Evidence based on the opinions of experts in guidelines or during consensus conferences, or the opinions of the members of the working group responsible for these recommendations."</i> |
| <b>Pain of the spinous processes</b>                         | Monticone, 2013 | Level 5 <sup>7,11</sup>  | Not reported | <i>"Evidence based on the opinions of experts in guidelines or during consensus conferences, or the opinions of the members of the working group responsible for these recommendations."</i> |
| <b>MYELOPATHY (Number of guidelines = 5, Red flags = 15)</b> |                 |                          |              |                                                                                                                                                                                              |
| <b>Painful stiff neck</b>                                    | Lemeunier, 2017 | Not reported             | Not reported | Not reported                                                                                                                                                                                 |
|                                                              | Coté, 2016      | Level 5 <sup>5 6 7</sup> | Not reported | <i>"As there is a paucity of literature on red flags for neck pain, the list of red flags was informed by the low back pain literature"</i>                                                  |

|                                                                                                     |                 |                          |              |                                                                                                                                                                                              |
|-----------------------------------------------------------------------------------------------------|-----------------|--------------------------|--------------|----------------------------------------------------------------------------------------------------------------------------------------------------------------------------------------------|
| <b>Neurological symptoms (e.g., sensory deficits, motor weakness, bowel or bladder dysfunction)</b> | Bier, 2018      | Level 5 <sup>7</sup>     | Not reported | Not reported                                                                                                                                                                                 |
| <b>Arm pain</b>                                                                                     | Lemeunier, 2017 | Not reported             | Not reported | Not reported                                                                                                                                                                                 |
|                                                                                                     | Coté, 2016      | Level 5 <sup>5 6 7</sup> | Not reported | <i>“As there is a paucity of literature on red flags for neck pain, the list of red flags was informed by the low back pain literature”</i>                                                  |
| <b>Pain radiating to upper and lower limbs</b>                                                      | Monticone, 2013 | Level 5 <sup>7,11</sup>  | Not reported | <i>“Evidence based on the opinions of experts in guidelines or during consensus conferences, or the opinions of the members of the working group responsible for these recommendations.”</i> |
| <b>Sensory deficit</b>                                                                              | Karppinen, 2017 | Not reported             | Not reported | Not reported                                                                                                                                                                                 |
|                                                                                                     | Monticone, 2013 | Level 5 <sup>7,11</sup>  | Not reported | <i>“Evidence based on the opinions of experts in guidelines or during consensus conferences, or the opinions of the members of the working group responsible for these recommendations.”</i> |
| <b>Sensory changes in the lower extremities</b>                                                     | Lemeunier, 2017 | Not reported             | Not reported | Not reported                                                                                                                                                                                 |
|                                                                                                     | Coté, 2016      | Level 5 <sup>5 6 7</sup> | Not reported | <i>“As there is a paucity of literature on red flags for neck pain, the list of red flags was informed by the low back pain literature”</i>                                                  |
| <b>Impaired motor skills</b>                                                                        | Lemeunier, 2017 | Not reported             | Not reported | Not reported                                                                                                                                                                                 |
| <b>Motor weakness</b>                                                                               | Lemeunier, 2017 | Not reported             | Not reported | Not reported                                                                                                                                                                                 |
|                                                                                                     | Coté, 2016      | Level 5 <sup>5 6 7</sup> | Not reported | <i>“As there is a paucity of literature on red flags for neck pain, the list of red flags was informed by the low back pain literature”</i>                                                  |
|                                                                                                     | Monticone, 2013 | Level 5 <sup>7,11</sup>  | Not reported | <i>“Evidence based on the opinions of experts in guidelines or during consensus conferences, or the opinions of the members of the working group responsible for these recommendations.”</i> |
| <b>Muscular atrophy</b>                                                                             | Lemeunier, 2017 | Not reported             | Not reported | Not reported                                                                                                                                                                                 |
|                                                                                                     | Coté, 2016      | Level 5 <sup>5 6 7</sup> | Not reported | <i>“As there is a paucity of literature on red flags for neck pain, the list of red flags was informed by the low back pain literature”</i>                                                  |
| <b>Spasticity</b>                                                                                   | Karppinen, 2017 | Not reported             | Not reported | Not reported                                                                                                                                                                                 |
| <b>Hyperreflexia</b>                                                                                | Lemeunier, 2017 | Not reported             | Not reported | Not reported                                                                                                                                                                                 |

|                                                                                                     |                 |                          |              |                                                                                                                                                                                              |
|-----------------------------------------------------------------------------------------------------|-----------------|--------------------------|--------------|----------------------------------------------------------------------------------------------------------------------------------------------------------------------------------------------|
|                                                                                                     | Coté, 2016      | Level 5 <sup>5 6 7</sup> | Not reported | <i>“As there is a paucity of literature on red flags for neck pain, the list of red flags was informed by the low back pain literature”</i>                                                  |
| <b>Changes in bladder or bowel retention</b>                                                        | Karppinen, 2017 | Not reported             | Not reported | Not reported                                                                                                                                                                                 |
| <b>Sphincter incontinence</b>                                                                       | Monticone, 2013 | Level 5 <sup>7,11</sup>  | Not reported | <i>“Evidence based on the opinions of experts in guidelines or during consensus conferences, or the opinions of the members of the working group responsible for these recommendations.”</i> |
| <b>Spastic gait</b>                                                                                 | Lemeunier, 2017 | Not reported             | Not reported | Not reported                                                                                                                                                                                 |
|                                                                                                     | Coté, 2016      | Level 5 <sup>5 6 7</sup> | Not reported | <i>“As there is a paucity of literature on red flags for neck pain, the list of red flags was informed by the low back pain literature”</i>                                                  |
| <b>Difficulty in walking</b>                                                                        | Karppinen, 2017 | Not reported             | Not reported | Not reported                                                                                                                                                                                 |
|                                                                                                     | Monticone, 2013 | Level 5 <sup>7,11</sup>  | Not reported | <i>“Evidence based on the opinions of experts in guidelines or during consensus conferences, or the opinions of the members of the working group responsible for these recommendations.”</i> |
| <b>INJURY TO THE SPINAL CORD (Number of guidelines = 1, Red flags = 1)</b>                          |                 |                          |              |                                                                                                                                                                                              |
| <b>Neurological symptoms (e.g., sensory deficits, motor weakness, bowel or bladder dysfunction)</b> | Bier, 2018      | Level 5 <sup>7</sup>     | Not reported | Not reported                                                                                                                                                                                 |
| <b>CAROTID/VERTEBRAL ARTERY DISSECTION (Number of guidelines = 4, Red flags = 7)</b>                |                 |                          |              |                                                                                                                                                                                              |
| <b>Sudden onset of headache or neck pain</b>                                                        | Lemeunier, 2017 | Not reported             | Not reported | Not reported                                                                                                                                                                                 |
|                                                                                                     | Coté, 2016      | Level 5 <sup>5 6 7</sup> | Not reported | <i>“As there is a paucity of literature on red flags for neck pain, the list of red flags was informed by the low back pain literature”</i>                                                  |
| <b>Cerebrovascular symptoms or signs</b>                                                            | Bier, 2018      | Level 5 <sup>14</sup>    | Not reported | Not reported                                                                                                                                                                                 |
| <b>Visual disturbances</b>                                                                          | Karppinen, 2017 | Level 5 <sup>13</sup>    | Not reported | Not reported                                                                                                                                                                                 |
| <b>Half - symptoms</b>                                                                              | Karppinen, 2017 | Level 5 <sup>13</sup>    | Not reported | Not reported                                                                                                                                                                                 |
| <b>Higher brain function disorders</b>                                                              | Karppinen, 2017 | Level 5 <sup>13</sup>    | Not reported | Not reported                                                                                                                                                                                 |
| <b>Horner’s syndrome</b>                                                                            | Karppinen, 2017 | Level 5 <sup>13</sup>    | Not reported | Not reported                                                                                                                                                                                 |

|                                                                                        |                 |                            |                              |                                                                                                                                                                                              |
|----------------------------------------------------------------------------------------|-----------------|----------------------------|------------------------------|----------------------------------------------------------------------------------------------------------------------------------------------------------------------------------------------|
| <b>Cranial nerve dysfunctions, especially in the lower cranial nerves</b>              | Karppinen, 2017 | Level 5 <sup>13</sup>      | Not reported                 | Not reported                                                                                                                                                                                 |
| <b>INTRACRNIAL PATHOLOGY (Number of guidelines = 3, Red flags = 3)</b>                 |                 |                            |                              |                                                                                                                                                                                              |
| <b>Positive Valsalva maneuver in patients with headache that worsens with exertion</b> | Blanpied, 2017  | Level 5 <sup>13</sup>      | LR+: 2.3 (95% CI: 1.4 – 3.8) | Not reported                                                                                                                                                                                 |
| <b>Sudden onset of headache</b>                                                        | Coté, 2016      | Level 5 <sup>5 6 7</sup>   | Not reported                 | <i>“As there is a paucity of literature on red flags for neck pain, the list of red flags was informed by the low back pain literature”</i>                                                  |
| <b>Reported “worst headache ever”</b>                                                  | Whalen, 2019    | Level 5 <sup>15,16</sup>   | Not reported                 | Not reported                                                                                                                                                                                 |
| <b>INFLAMMATORY ARTHRITIS (Number of guidelines = 2, Red flags = 2)</b>                |                 |                            |                              |                                                                                                                                                                                              |
| <b>Morning stiffness</b>                                                               | Lemeunier, 2017 | Not reported               | Not reported                 | Not reported                                                                                                                                                                                 |
|                                                                                        | Coté, 2016      | Level 5 <sup>5 6 7</sup>   | Not reported                 | <i>“As there is a paucity of literature on red flags for neck pain, the list of red flags was informed by the low back pain literature”</i>                                                  |
| <b>Swelling in multiple joints</b>                                                     | Lemeunier, 2017 | Not reported               | Not reported                 | Not reported                                                                                                                                                                                 |
| <b>SYSTEMIC DISEASE (Number of guidelines = 2, Red flags = 6)</b>                      |                 |                            |                              |                                                                                                                                                                                              |
| <b>Presence of a rheumatological disease</b>                                           | Monticone, 2013 | Level 5 <sup>7,11</sup>    | Not reported                 | <i>“Evidence based on the opinions of experts in guidelines or during consensus conferences, or the opinions of the members of the working group responsible for these recommendations.”</i> |
| <b>Headache</b>                                                                        | Bier, 2018      | Level 5 <sup>17</sup>      | Not reported                 | Not reported                                                                                                                                                                                 |
| <b>Fever</b>                                                                           | Bier, 2018      | Level 5 <sup>17</sup>      | Not reported                 | Not reported                                                                                                                                                                                 |
| <b>Unilateral skin rash</b>                                                            | Bier, 2018      | Level 5 <sup>17</sup>      | Not reported                 | Not reported                                                                                                                                                                                 |
| <b>Burning pain</b>                                                                    | Bier, 2018      | Level 5 <sup>17</sup>      | Not reported                 | Not reported                                                                                                                                                                                 |
| <b>Itching</b>                                                                         | Bier, 2018      | Level 5 <sup>17</sup>      | Not reported                 | Not reported                                                                                                                                                                                 |
| <b>GENERAL PATHOLOGIES (Number of guidelines = 2, Red flags = 19)</b>                  |                 |                            |                              |                                                                                                                                                                                              |
| <b>History of known connective tissue disease</b>                                      | Whalen, 2019    | Level 5 <sup>7 15 18</sup> | Not reported                 | Not reported                                                                                                                                                                                 |

|                                                                        |               |                               |              |              |
|------------------------------------------------------------------------|---------------|-------------------------------|--------------|--------------|
| <b>History of Osteopenia</b>                                           | Whalen, 2019  | Level 5 <sup>7 15 18</sup>    | Not reported | Not reported |
| <b>History of significant trauma</b>                                   | Whalen, 2019  | Level 5 <sup>7 15 18</sup>    | Not reported | Not reported |
| <b>History of infection</b>                                            | Whalen, 2019  | Level 5 <sup>7 15 18</sup>    | Not reported | Not reported |
| <b>Unexplained/novel neck pain especially ages &lt; 20 or &gt; 55</b>  | Whalen, 2019  | Level 5 <sup>7 15 18</sup>    | Not reported | Not reported |
| <b>History of cancer</b>                                               | Whalen, 2019  | Level 5 <sup>7 15 18</sup>    | Not reported | Not reported |
| <b>Unexplained weight loss</b>                                         | Whalen, 2019  | Level 5 <sup>7 15 18</sup>    | Not reported | Not reported |
|                                                                        | Scherer, 2016 | Not reported.                 |              |              |
| <b>Severe nocturnal pain</b>                                           | Whalen, 2019  | Level 5 <sup>7 15 18</sup>    | Not reported | Not reported |
| <b>Confusion/altered consciousness</b>                                 | Whalen, 2019  | Level 5 <sup>7 15 18</sup>    | Not reported | Not reported |
|                                                                        | Scherer, 2016 | Not reported                  | Not reported | Not reported |
| <b>Visual or speech disturbances</b>                                   | Whalen, 2019  | Level 5 <sup>7 15 18</sup>    | Not reported | Not reported |
| <b>Weakness</b>                                                        | Whalen, 2019  | Level 5 <sup>7 15 18</sup>    | Not reported | Not reported |
| <b>Loss of sensation</b>                                               | Whalen, 2019  | Level 5 <sup>7 15 18</sup>    | Not reported | Not reported |
| <b>Abnormal upper extremity sensory, motor or deep tendon reflexes</b> | Whalen, 2019  | Level 5 <sup>7 15 18 19</sup> | Not reported | Not reported |
| <b>Fever</b>                                                           | Whalen, 2019  | Level 5 <sup>7 15 18 19</sup> | Not reported | Not reported |
|                                                                        | Scherer, 2016 | Not reported                  | Not reported | Not reported |
| <b>Nuchal rigidity</b>                                                 | Whalen, 2019  | Level 5 <sup>7 15 18 19</sup> | Not reported | Not reported |
| <b>Positive Rust, Lhermette, Hoffman or Babinski sign</b>              | Whalen, 2019  | Level 5 <sup>7 15 18 19</sup> | Not reported | Not reported |
| <b>Pain pattern unrelated to movements or activities</b>               | Whalen, 2019  | Level 5 <sup>7 15 18 19</sup> | Not reported | Not reported |



|                                                                             |               |                          |              |              |
|-----------------------------------------------------------------------------|---------------|--------------------------|--------------|--------------|
| Headache with nausea, vomiting or dizziness                                 | Scherer, 2016 | Not reported             | Not reported | Not reported |
| Reduced general condition                                                   | Scherer, 2016 | Not reported             | Not reported | Not reported |
| <b>GENERAL PATHOLOGIES IN WAD (Number of guidelines = 1, Red flags = 9)</b> |               |                          |              |              |
| Bilateral paresthesia in upper/lower limbs                                  | Moore, 2005   | Not reported             | Not reported | Not reported |
| Gait disturbances (e.g., tripping and coordination difficulties)            | Moore, 2005   | Level 5 <sup>20,21</sup> | Not reported | Not reported |
| Spastic paresis                                                             | Moore, 2005   | Level 5 <sup>21</sup>    | Not reported | Not reported |
| Positive Lhermitte's sign                                                   | Moore, 2005   | Not reported             | Not reported | Not reported |
| Hyperreflexia                                                               | Moore, 2005   | Level 5 <sup>21</sup>    | Not reported | Not reported |
| Nerve root signs at more than two adjacent levels                           | Moore, 2005   | Level 5 <sup>22 23</sup> | Not reported | Not reported |
| Progressively worsening neurological signs                                  | Moore, 2005   | Level 5 <sup>22 23</sup> | Not reported | Not reported |
| Symptoms of upper cervical instability                                      | Moore, 2005   | Level 5 <sup>24</sup>    | Not reported | Not reported |
| Non-mechanical pain which is unremitting and severe                         | Moore, 2005   | Level 5 <sup>22 23</sup> | Not reported | Not reported |

WAD: whiplash and associated disorders

1. Saragiotto BT, Maher CG, Lin CC, Verhagen AP, Goergen S, Michaleff ZA. Canadian C-spine rule and the National Emergency X-Radiography Utilization Study (NEXUS) for detecting clinically important cervical spine injury following blunt trauma. *Cochrane Database Syst Rev.* 2018;2018(4):CD012989. doi:10.1002/14651858.CD012989
2. Conlin A, Bhogal S, Sequeira K, Teasell R. Treatment of whiplash-associated disorders--part I: Non-invasive interventions. *Pain Res Manag.* 2005;10(1):21-32. doi:10.1155/2005/503704
3. Stiell IG, Clement CM, Grimshaw J, et al. Implementation of the Canadian C-Spine Rule: prospective 12 centre cluster randomised trial. *BMJ.* 2009;339:b4146. doi:10.1136/bmj.b4146

4. Stiell IG, Wells GA, Vandemheen KL, et al. The Canadian C-spine rule for radiography in alert and stable trauma patients. *JAMA*. 2001;286(15):1841-1848. doi:10.1001/jama.286.15.1841
5. Chou R, Qaseem A, Snow V, et al. Diagnosis and treatment of low back pain: a joint clinical practice guideline from the American College of Physicians and the American Pain Society. *Ann Intern Med*. 2007;147(7):478-491. doi:10.7326/0003-4819-147-7-200710020-00006
6. Downie A, Williams CM, Henschke N, et al. Red flags to screen for malignancy and fracture in patients with low back pain: systematic review. *BMJ*. 2013;347:f7095. doi:10.1136/bmj.f7095
7. Nordin M, Carragee EJ, Hogg-Johnson S, et al. Assessment of neck pain and its associated disorders: results of the Bone and Joint Decade 2000-2010 Task Force on Neck Pain and Its Associated Disorders. *Spine (Phila Pa 1976)*. 2008;33(4 Suppl):S101-122. doi:10.1097/BRS.0b013e3181644ae8
8. Bandiera G, Stiell IG, Wells GA, et al. The Canadian C-spine rule performs better than unstructured physician judgment. *Ann Emerg Med*. 2003;42(3):395-402. doi:10.1016/s0196-0644(03)00422-0
9. Panacek EA, Mower WR, Holmes JF, Hoffman JR, NEXUS Group. Test performance of the individual NEXUS low-risk clinical screening criteria for cervical spine injury. *Ann Emerg Med*. 2001;38(1):22-25. doi:10.1067/mem.2001.116499
10. Stiell IG, Clement CM, O'Connor A, et al. Multicentre prospective validation of use of the Canadian C-Spine Rule by triage nurses in the emergency department. *CMAJ*. 2010;182(11):1173-1179. doi:10.1503/cmaj.091430
11. Rubinstein SM, van Tulder M. A best-evidence review of diagnostic procedures for neck and low-back pain. *Best Pract Res Clin Rheumatol*. 2008;22(3):471-482. doi:10.1016/j.berh.2007.12.003
12. Childs JD, Cleland JA, Elliott JM, et al. Neck pain: Clinical practice guidelines linked to the International Classification of Functioning, Disability, and Health from the Orthopedic Section of the American Physical Therapy Association. *J Orthop Sports Phys Ther*. 2008;38(9):A1-A34. doi:10.2519/jospt.2008.0303
13. duo11890.pdf. Accessed February 3, 2024. <https://www.duodecimlehti.fi/xmedia/duo/duo11890.pdf>
14. Silbert PL, Mokri B, Schievink WI. Headache and neck pain in spontaneous internal carotid and vertebral artery dissections. *Neurology*. 1995;45(8):1517-1522. doi:10.1212/wnl.45.8.1517
15. Cohen SP, Hooten WM. Advances in the diagnosis and management of neck pain. *BMJ*. 2017;358:j3221. doi:10.1136/bmj.j3221
16. Vijjaratnam N, Williams DR, Bertram KL. Neck pain: What if it is not musculoskeletal? *Aust J Gen Pract*. 2018;47(5):279-282. doi:10.31128/AFP-10-17-4358

17. Dworkin RH, Johnson RW, Breuer J, et al. Recommendations for the management of herpes zoster. *Clin Infect Dis*. 2007;44 Suppl 1:S1-26. doi:10.1086/510206
18. Mattox R, Smith LW, Kettner NW. Recognition of Spontaneous Vertebral Artery Dissection Preempting Spinal Manipulative Therapy: A Patient Presenting With Neck Pain and Headache for Chiropractic Care. *J Chiropr Med*. 2014;13(2):90-95. doi:10.1016/j.jcm.2014.06.011
19. Cassidy JD, Boyle E, Côté P, et al. Risk of Vertebrobasilar Stroke and Chiropractic Care: Results of a Population-Based Case-Control and Case-Crossover Study. *European Spine Journal*. 2008;17(Suppl 1):176. doi:10.1007/s00586-008-0634-9
20. Boyling J, Jull G. *Grieve's Modern Manual Therapy: The Vertebral Column*. 3rd edition. Churchill Livingstone; 2005.
21. CM DJMBP, CSCS RCMPDSMeA. *Orthopedic Physical Assessment*. 7th edition. Saunders; 2021.
22. Rose MJ, Beattie GM. Clinical Guidelines for the Management of Acute Low Back Pain. *Physiotherapy*. 1996;82(11):644. doi:10.1016/S0031-9406(05)66362-6
23. Petty NJ. *Neuromusculoskeletal Examination and Assessment: A Handbook for Therapists*. 0 edition. Churchill Livingstone; 1998.
24. Maitland GD. *Maitland's Vertebral Manipulation*. 6th ed. Butterworth-Heinemann; 2001.

**SUPPLEMENTARY MATERIAL 4 - ADDITIONAL REFERENCES PROVIDED BY  
BLANPIED ET AL. (2017)**

“Clinical tests used in the diagnostic process for cervical myelopathy generally have low sensitivity; therefore, they should not be used when screening for and diagnosing this condition.”<sup>1</sup>

“The 2012 IFOMPT “International Framework for Examination of the Cervical Region for potential of Cervical Arterial Dysfunction prior to Orthopaedic Manual Therapy Intervention” provides a decision-making pathway for assessment of suspected arterial insufficiency and upper cervical ligamentous integrity.<sup>177</sup> Because clinicians cannot rely on the results of any single test, including imaging,<sup>146</sup> the framework provides a tool to guide assessment of both risk factors and clinical presentation, and to make patient-centered, evidence-driven decisions on management”

“One high-quality systematic review by Hutting et al<sup>95</sup> revealed poor diagnostic accuracy for all upper cervical ligament integrity tests evaluated. Generally, these tests have sufficient specificity and can rule in upper cervical ligamentous insufficiency, but extent of sensitivity varied.”<sup>2</sup>

“The National Institute for Health and Care Excellence produced a guideline that lists signs, symptoms, and conditions that should be considered when deciding the need for additional screening in patients who present with a headache in addition to neck pain.”<sup>3</sup>

1. Cook CE, Wilhelm M, Cook AE, Petrosino C, Isaacs R. Clinical tests for screening and diagnosis of cervical spine myelopathy: a systematic review. *J Manipulative Physiol Ther.* 2011;34(8):539-546. doi:10.1016/j.jmpt.2011.08.008
2. Hutting N, Scholten-Peeters GGM, Vijverman V, Keesenberg MDM, Verhagen AP. Diagnostic Accuracy of Upper Cervical Spine Instability Tests: A Systematic Review. *Physical Therapy.* 2013;93(12):1686-1695. doi:10.2522/ptj.20130186
3. Overview | Headaches in over 12s: diagnosis and management | Guidance | NICE. Published September 19, 2012. Accessed January 4, 2024. <https://www.nice.org.uk/guidance/cg150>
